# Supplementary material for: Diversities in the Gut Microbial Patterns in Patients with Atherosclerotic Cardiovascular Diseases and Certain Heart Failure Phenotypes
Source: MDPI journal article supplement (doi:10.3390/biomedicines10112762), 2022-10-31
Supplement: s1 [file s1]

## Supplementary materials

**Table S1.** Primer sets used in the qPCR study.

| Target organism              | Primer set          | Sequence (5' to 3')         |
|------------------------------|---------------------|-----------------------------|
| Total bacteria amount        | 515F                | GTGCCAGCAGCCGCGGTAA         |
|                              | 806R                | GACTACCAGGGTATCTAATCC       |
|                              | Uni probe Fam/BHQ1  | TMTCTRMGCATTYCACCGCTAC      |
| <i>Bacteroides sp.</i>       | Bac F               | ATTGGGTTTAAAGGGAGCGT        |
|                              | Bac R               | CTACACCACGAATTCCGCCT        |
|                              | Bac P Fam/BHQ1      | TCAGTTGTGAAAGTTTGC GGCTCAAC |
| Enterobacteriaceae           | Ent-ceae F          | TCCCCGGGCTCAACCTG           |
|                              | Ent-ceae R          | CCAARTCGACATCGTTTACG        |
|                              | Ent-ceae P Fam/BHQ1 | CTCTACRAGACTCWAGCYTGCCA     |
| Lactobacillaceae             | Lac-ceae F          | CAGCAGTAGGGAATCTTCCA        |
|                              | Lac-ceae R          | AGTTTCCGATGCRVTTC           |
|                              | Lac-ceae P Fam/BHQ1 | TGATGGAGCAACRCCGCGTG        |
| Christensenellaceae          | Christ F            | ACCGCATGAGACCACGAAACCG      |
|                              | Christ R            | TCCCATAGGACAAAGGTTTAC       |
|                              | Christ P Fam/BHQ1   | TCGATGCAGGATGGGCTCGCG       |
| <i>Bifidobacterium sp.</i>   | Bif F               | CGAACGGGTGAGTAATGCGT        |
|                              | Bif R               | TGATAGGACGCGACCCCATC        |
|                              | Bif P Fam/BHQ1      | CCGGAATAGCTCCTGGAAACGGGT    |
| <i>Odoribacter sp.</i>       | Odor F              | GCCCATGGAAACGTGGAT          |
|                              | Odor R              | CAGTCTTCCCTCACGCGA          |
|                              | Odor P Fam/BHQ1     | AGGGGTTCTGAGAGGAAGGTC       |
| <i>Oscillibacter sp.</i>     | Oscill F            | TTAACTGCGGCACGCAG           |
|                              | Oscill R            | GTGTAACTGCGGCACG            |
|                              | Oscill P Fam/BHQ1   | AGGTGTGCGGGGACTGACC         |
| <i>Enterococcus faecalis</i> | Ent fae F           | GCAAGTCGAACGCTTCTTTC        |
|                              | Ent fae R           | GCCTTTCACTCTTATGCCATG       |

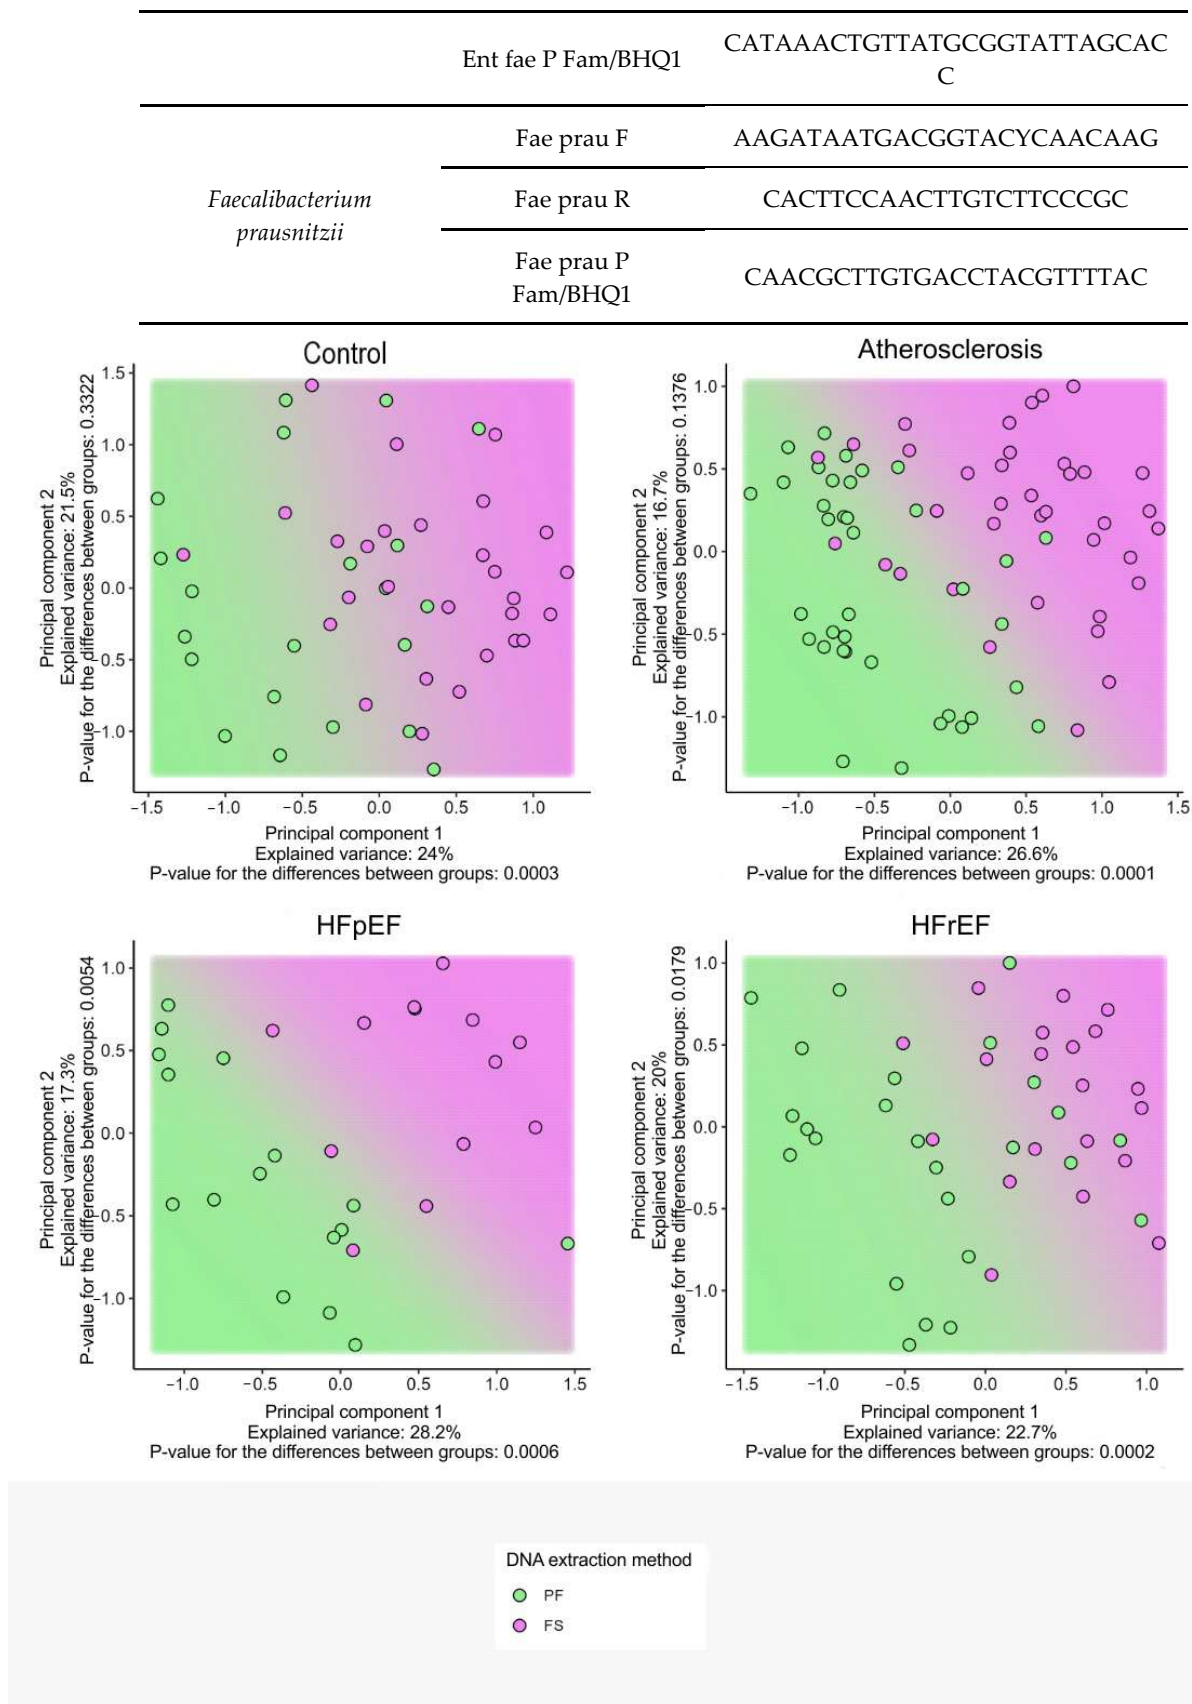

**Figure S1.** Influence of the extraction method on qPCR results, PCA plots for all investigated groups of patients and control. All individual OTU (bacterial) concentrations were subjected to PCA and the first two principal components, PC1 and PC2, were plotted. Green circles indicate PF method; violet dots – FS method. Profiles of each method in the plots indicate that the choice of DNA ex-traction method affects the results of qPCR study.

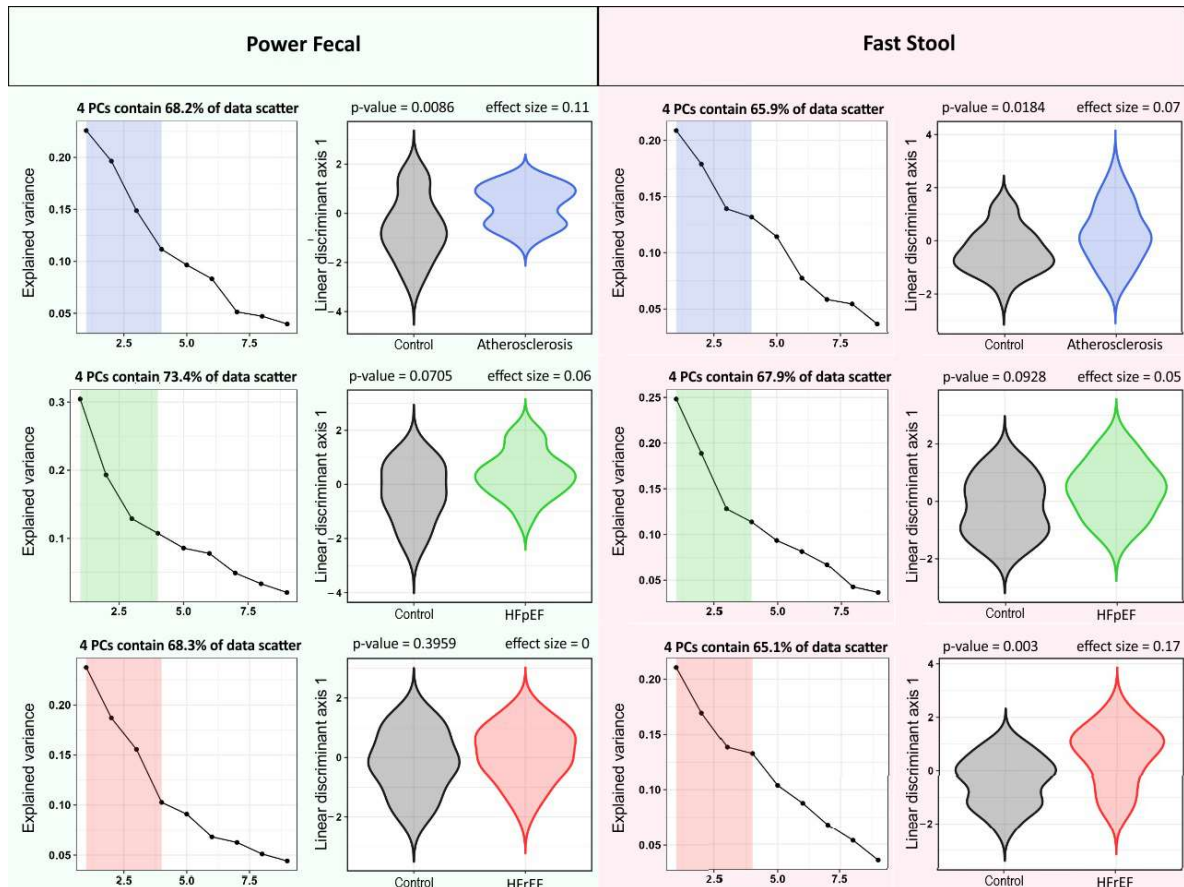

**Figure S2.** PCA and LDA analysis for qPCR results: comparison of control and disease groups for both extraction methods, Power Fecal and Fast Stool. Results of PCA data processing, the established correlation between the best discriminant axis and initial indicators, the distribution of the observed group values across the best discriminant axis. Blue: graphs for ASCVD; green: graphs for HFpEF; red: graphs for HFrEF. Despite the absence of clear differences between the samples of patients and healthy individuals for each particular taxon, the combination all PCR taxa for principal component method and linear discriminant analysis managed to reliably separate healthy control from patients with atherosclerosis for both extraction methods.
